# Supplementary material for: Hsa_circ_0015278 Regulates FLT3-ITD AML Progression via Ferroptosis-Related Genes
Source: MDPI journal article supplement (doi:10.3390/cancers15010071), 2022-12-22
Supplement: s1 [file s1]

Table S6. 15 hub genes were obtained by the 12 algorithms

|                              | <b>SIRT1</b> | <b>MAPK3</b> | <b>MAPK8</b> | <b>NFE2L2</b> | <b>CDKN1A</b> | <b>CDH1</b> | <b>CDKN2A</b> | <b>STAT3</b> |
|------------------------------|--------------|--------------|--------------|---------------|---------------|-------------|---------------|--------------|
| <b>MCC</b>                   | 5567.0       | 5580.0       | 5289.0       | 5700.0        | 5308.0        | 5356.0      | 5162.0        | 5669.0       |
| <b>DMNC</b>                  | 0.38858      | 0.46068      | 0.54289      | 0.31531       | 0.63848       | 0.61085     | 0.62053       | 0.45768      |
| <b>MNC</b>                   | 17.0         | 15.0         | 11.0         | 24.0          | 10.0          | 11.0        | 9.0           | 16.0         |
| <b>Degree</b>                | 18.0         | 17.0         | 12.0         | 24.0          | 10.0          | 11.0        | 9.0           | 17.0         |
| <b>EPC</b>                   | 20.809       | 20.499       | 19.218       | 21.815        | 18.342        | 18.873      | 18.105        | 21.042       |
| <b>BottleNeck</b>            | 12.0         | 8.0          | 2.0          | 14.0          | 3.0           | 3.0         | 1.0           | 6.0          |
| <b>EcCentricity</b>          | 0.25         | 0.25         | 0.25         | 0.25          | 0.25          | 0.25        | 0.25          | 0.25         |
| <b>Closeness</b>             | 37.75        | 37.83333     | 34.1667      | 41.83333      | 33.08333      | 33.33333    | 32.58333      | 37.83333     |
| <b>Radiality</b>             | 6.07813      | 6.125        | 5.92188      | 6.28125       | 5.89063       | 5.875       | 5.875         | 6.125        |
| <b>Betweenness</b>           | 400.13101    | 405.15776    | 132.5647     | 989.55028     | 59.45558      | 63.89781    | 58.03249      | 371.11543    |
| <b>Stress</b>                | 1568.0       | 1452.0       | 492.0        | 3008.0        | 402.0         | 338.0       | 392.0         | 1272.0       |
| <b>ClusteringCoefficient</b> | 0.31373      | 0.33824      | 0.48485      | 0.25362       | 0.71111       | 0.65455     | 0.72222       | 0.375        |

|                              | ATG7      | TFRC      | SQSTM1    | CD44      | GSK3B     | G6PD      | SRXN1     |
|------------------------------|-----------|-----------|-----------|-----------|-----------|-----------|-----------|
| <b>MCC</b>                   | 416.0     | 31.0      | 204.0     | 152.0     | 219.0     | 16.0      | 21.0      |
| <b>DMNC</b>                  | 0.42441   | 0.56839   | 0.31046   | 0.38186   | 0.45891   | 0.47366   | 0.38039   |
| <b>MNC</b>                   | 12.0      | 4.0       | 15.0      | 9.0       | 10.0      | 4.0       | 6.0       |
| <b>Degree</b>                | 12.0      | 10.0      | 15.0      | 11.0      | 11.0      | 8.0       | 7.0       |
| <b>EPC</b>                   | 18.717    | 13.119    | 19.394    | 17.45     | 18.001    | 10.257    | 12.455    |
| <b>BottleNeck</b>            | 4.0       | 9.0       | 7.0       | 3.0       | 1.0       | 4.0       | 3.0       |
| <b>EcCentricity</b>          | 0.25      | 0.2       | 0.25      | 0.2       | 0.25      | 0.25      | 0.25      |
| <b>Closeness</b>             | 34.25     | 33.23333  | 36.41667  | 32.48333  | 33.58333  | 30.91667  | 31.0      |
| <b>Radiality</b>             | 5.92188   | 5.85938   | 6.0625    | 5.75      | 5.90625   | 5.73438   | 5.78125   |
| <b>Betweenness</b>           | 134.53345 | 448.24402 | 393.71901 | 255.81264 | 129.03965 | 339.69365 | 293.53975 |
| <b>Stress</b>                | 612.0     | 1142.0    | 1506.0    | 964.0     | 584.0     | 750.0     | 714.0     |
| <b>ClusteringCoefficient</b> | 0.43939   | 0.17778   | 0.29524   | 0.29091   | 0.41818   | 0.21429   | 0.38095   |
