# Supplementary material for: Hsa_circ_0015278 Regulates FLT3-ITD AML Progression via Ferroptosis-Related Genes
Source: MDPI journal article supplement (doi:10.3390/cancers15010071), 2022-12-22
Supplement: s1 [file s1]

Table S3 Bioinformatics tools and databases used in this study

| Database                                                    | Hyperlinks                                                                                                                        | Function                                                                                     |
|-------------------------------------------------------------|-----------------------------------------------------------------------------------------------------------------------------------|----------------------------------------------------------------------------------------------|
| TCGA                                                        | <a href="https://portal.gdc.cancer.gov/">https://portal.gdc.cancer.gov/</a>                                                       | TCGA and GTEx were used to retrieve AML RNA-Seq and corresponding clinicopathological data.  |
| GTEx                                                        | <a href="https://gtexportal.org/home/datasets">https://gtexportal.org/home/datasets</a>                                           |                                                                                              |
| Gene Expression Omnibus (GEO)                               | <a href="http://www.ncbi.nlm.nih.gov/geo">http://www.ncbi.nlm.nih.gov/geo</a>                                                     | GEO was used to obtain circRNA and gene expression profiles microarray data.                 |
| FerrDb V2 website                                           | <a href="http://www.zhounan.org/ferrdb/current/">http://www.zhounan.org/ferrdb/current/</a>                                       | The ferroptosis genes (Ferr-Genes) were downloaded from FerrDb V2 website.                   |
| CircInteractome                                             | <a href="https://circinteractome.nia.nih.gov/">https://circinteractome.nia.nih.gov/</a>                                           | These website tools were used to predict the target miRNAs of circRNAs.                      |
| circbank                                                    | <a href="http://www.circbank.cn/index.html">http://www.circbank.cn/index.html</a>                                                 |                                                                                              |
| circAtlas                                                   | <a href="http://circatlas.biols.ac.cn/">http://circatlas.biols.ac.cn/</a>                                                         |                                                                                              |
| TargetScan                                                  | <a href="https://www.targetscan.org/vert_80/">https://www.targetscan.org/vert_80/</a>                                             | These website tools were used to predict target mRNAs of the miRNAs.                         |
| ENCORI                                                      | <a href="https://starbase.sysu.edu.cn/">https://starbase.sysu.edu.cn/</a>                                                         |                                                                                              |
| miRWalk                                                     | <a href="http://mirwalk.umm.uni-heidelberg.de/">http://mirwalk.umm.uni-heidelberg.de/</a>                                         |                                                                                              |
| Search Tool for the Retrieval of Interacting Genes (STRING) | <a href="https://cn.string-db.org/">https://cn.string-db.org/</a>                                                                 | The PPI network was built utilizing STRING.                                                  |
| lncLocator                                                  | <a href="http://www.csbio.sjtu.edu.cn/bioinf/lncLocator/index.html">http://www.csbio.sjtu.edu.cn/bioinf/lncLocator/index.html</a> | The subcellular localization of circRNA was performed through the lncLocator online website. |
| Cancer-Specific CircRNA Database (CSCD)                     | <a href="http://gb.whu.edu.cn/CSCD/">http://gb.whu.edu.cn/CSCD/</a>                                                               | CSCD was used to present the structural patterns of circRNAs.                                |
