# Supplementary material for: Hsa_circ_0015278 Regulates FLT3-ITD AML Progression via Ferroptosis-Related Genes
Source: MDPI journal article supplement (doi:10.3390/cancers15010071), 2022-12-22
Supplement: s1 [file s1]

Table S1. The detailed information of microarray datasets from GEO database

| Data source | series   | Platform | Author | Year | Samples (T&N) | Tissue      |
|-------------|----------|----------|--------|------|---------------|-------------|
| circRNA     | GSE94591 | GPL19978 | Li W   | 2017 | 6/4           | Bone marrow |
| mRNA        | GSE65409 | GPL6947  | Tan SF | 2015 | 30/8          | PBMC        |
