# Supplementary material for: Hsa_circ_0015278 Regulates FLT3-ITD AML Progression via Ferroptosis-Related Genes
Source: MDPI journal article supplement (doi:10.3390/cancers15010071), 2022-12-22
Supplement: s1 [file s1]

Table S5. GO and KEGG enrichment analysis of 73 FerRGs

| ID              | Description                                 | Count | p-value  | FDR      | mRNAs                                                                                          |
|-----------------|---------------------------------------------|-------|----------|----------|------------------------------------------------------------------------------------------------|
| <b>BP terms</b> |                                             |       |          |          |                                                                                                |
| GO:0010038      | response to metal ion                       | 14    | 2.06E-10 | 7.69E-08 | ATF4, CDH1, NQO1, G6PD, MTF1, NEDD4, NFE2L2, C11A2, MAPK3, MAPK8, TFR2, TXNIP, NEDD4L, SLC40A1 |
| GO:0034599      | cellular response to oxidative stress       | 14    | 1.73E-11 | 1.84E-08 | ATF4, NQO1, FANCD2, G6PD, MYB, NCF2, NFE2L2, PRDX1, MAPK3, MAPK8, TSC1, ATG7, SIRT1, SRXN1     |
| GO:0031668      | cellular response to extracellular stimulus | 13    | 5.60E-11 | 2.93E-08 | ATF4, CDKN1A, LAMP2, NFE2L2, MAPK3, MAPK8, TSC1, VDR, ATG7, SIRT1, GABARAPL1, WIPI1, EIF2AK4   |
| GO:0072593      | reactive oxygen species metabolic process   | 9     | 4.59E-06 | 4.29E-04 | NQO1, MYB, NFE2L2, PRDX1, MAPK3, MAPK8, TXNIP, SIRT1                                           |
| GO:0030099      | myeloid cell differentiation                | 8     | 2.85E-04 | 7.04E-03 | ACVR1B, G6PD, SLC11A2, PRKCA, STAT3, TFRC, PIR, SIRT1                                          |
| GO:1901568      | fatty acid derivative metabolic process     | 6     | 6.10E-05 | 2.75E-03 | ALOX12, AKR1C2, MAPK3, SCD, SIRT1, FAR1                                                        |
| GO:0000302      | response to reactive oxygen species         | 8     | 4.59E-06 | 4.29E-04 | NQO1, MYB, NFE2L2, PRDX1, MAPK3, MAPK8, TXNIP, SIRT1                                           |
| GO:0071248      | cellular response to metal ion              | 8     | 1.04E-06 | 1.36E-04 | ATF4, CDH1, NQO1, NFE2L2, MAPK3, MAPK8, TFR2, SLC40A1                                          |
| GO:0002262      | myeloid cell homeostasis                    | 6     | 2.99E-05 | 1.63E-03 | ACVR1B, G6PD, HMGB1, SLC11A2, PRDX1, STAT3                                                     |
| GO:0006826      | iron ion transport                          | 6     | 2.31E-07 | 3.78E-05 | FTL, SLC11A2, TFR2, TFRC, SLC39A14, SLC40A1                                                    |
| <b>CC terms</b> |                                             |       |          |          |                                                                                                |
| GO:0031252      | cell leading edge                           | 7     | 9.95E-04 | 2.64E-02 | ATF4, CAPG, CD44, CDH1, TSC1, SLC39A14, GABARAPL1                                              |
| GO:0005770      | late endosome                               | 5     | 3.28E-03 | 7.67E-02 | LAMP2, SLC11A2, MAPK3, SQSTM1, NEDD4L                                                          |

|                 |                                                |   |          |          |                                                                        |
|-----------------|------------------------------------------------|---|----------|----------|------------------------------------------------------------------------|
| GO:0030027      | lamellipodium                                  | 5 | 9.53E-04 | 2.64E-02 | CAPG, CD44, CDH1, TSC1, SLC39A14                                       |
| GO:0101002      | ficolin-1-rich granule                         | 5 | 7.88E-04 | 2.64E-02 | CTSB, HMGB1, LAMP2, SLC2A3, ATG7                                       |
| GO:0048770      | pigment granule                                | 5 | 5.93E-05 | 3.55E-03 | CAPG, CTSB, PRDX1, SLC3A2, TFRC                                        |
| GO:0042470      | melanosome                                     | 5 | 5.93E-05 | 3.55E-03 | CAPG, CTSB, PRDX1, SLC3A2, TFRC                                        |
| GO:0005776      | autophagosome                                  | 5 | 3.17E-05 | 3.55E-03 | FTL, LAMP2, SQSTM1, GABARAPL1, WIPI1                                   |
| GO:0005767      | secondary lysosome                             | 4 | 2.09E-07 | 4.99E-05 | FTL, LAMP2, NCF2, SQSTM1                                               |
| GO:0000421      | autophagosome<br>membrane                      | 3 | 3.73E-04 | 1.48E-02 | LAMP2, GABARAPL1, WIPI1                                                |
| GO:0000407      | phagophore assembly<br>site                    | 3 | 2.62E-04 | 1.25E-02 | SQSTM1, ATG7, WIPI1                                                    |
| <b>MF terms</b> |                                                |   |          |          |                                                                        |
| GO:0004674      | protein<br>serine/threonine kinase<br>activity | 9 | 1.19E-04 | 6.43E-03 | ACVR1B, GSK3B, MAP3K11, PRKCA, MAPK3, MAPK8, AURKA,<br>SQSTM1, EIF2AK4 |
| GO:0031625      | ubiquitin protein ligase<br>binding            | 9 | 4.58E-06 | 1.21E-03 | ACVR1B, BID, CDKN1A, GSK3B, AURKA, SQSTM1, TXNIP,<br>GABARAPL1, TRIB3  |
| GO:0050662      | coenzyme binding                               | 7 | 2.72E-04 | 8.84E-03 | DECR1, G6PD, PGD, POR, NFS1, SIRT1, CYB5R1                             |
| GO:0051427      | hormone receptor<br>binding                    | 5 | 1.27E-03 | 2.58E-02 | STAT3, VDR, NCOA3, SIRT1, WIPI1                                        |
| GO:0035257      | nuclear hormone<br>receptor binding            | 5 | 5.26E-04 | 1.42E-02 | STAT3, VDR, NCOA3, SIRT1, WIPI1                                        |
| GO:0005506      | iron ion binding                               | 4 | 4.36E-03 | 5.06E-02 | ALOX12, FTL, RRM2, SCD                                                 |
| GO:0050661      | NADP binding                                   | 4 | 7.65E-05 | 6.22E-03 | DECR1, G6PD, PGD, POR                                                  |
| GO:0016209      | antioxidant activity                           | 3 | 6.26E-03 | 5.81E-02 | NQO1, PRDX1, SRXN1                                                     |
| GO:0046915      | transition metal ion<br>transmembrane          | 3 | 5.10E-04 | 1.42E-02 | SLC11A2, SLC39A14, SLC40A1                                             |

|             |                         |   |          |          |                                                           |
|-------------|-------------------------|---|----------|----------|-----------------------------------------------------------|
| GO:0008199  | transporter activity    |   |          |          |                                                           |
|             | ferric iron binding     | 2 | 1.00E-03 | 2.33E-02 | FTL, RRM2                                                 |
| <b>KEGG</b> |                         |   |          |          |                                                           |
| hsa04216    | Ferroptosis             | 8 | 3.41E-10 | 6.93E-08 | FTL, SLC11A2, SAT1, SLC3A2, TFRC, ATG7, SLC39A14, SLC40A1 |
| hsa04218    | Cellular senescence     | 6 | 8.34E-04 | 9.03E-03 | CDKN1A, CDKN2A, MAPK3, TSC1, SQSTM1, SIRT1                |
| hsa04068    | FoxO signaling pathway  | 6 | 3.29E-04 | 5.74E-03 | CDKN1A, MAPK3, MAPK8, STAT3, SIRT1, GABARAPL1             |
| hsa04150    | mTOR signaling pathway  | 5 | 4.93E-03 | 2.38E-02 | GSK3B, PRKCA, MAPK3, SLC3A2, TSC1                         |
| hsa04066    | HIF-1 signaling pathway | 5 | 1.06E-03 | 9.78E-03 | CDKN1A, PRKCA, MAPK3, STAT3, TFRC                         |
| hsa04012    | ErbB signaling pathway  | 5 | 3.39E-04 | 5.74E-03 | CDKN1A, GSK3B, PRKCA, MAPK3, MAPK8                        |
| hsa04115    | p53 signaling pathway   | 5 | 1.66E-04 | 4.07E-03 | BID, CDKN1A, CDKN2A, CD82, RRM2                           |
| hsa04912    | GnRH signaling pathway  | 4 | 4.35E-03 | 2.21E-02 | ATF4, PRKCA, MAPK3, MAPK8                                 |
| hsa04978    | Mineral absorption      | 4 | 8.12E-04 | 9.03E-03 | FTL, SLC11A2, VDR, SLC40A1                                |
| hsa00480    | Glutathione metabolism  | 3 | 7.82E-03 | 3.31E-02 | G6PD, PGD, RRM2                                           |
