# Supplementary material for: Hsa_circ_0015278 Regulates FLT3-ITD AML Progression via Ferroptosis-Related Genes
Source: MDPI journal article supplement (doi:10.3390/cancers15010071), 2022-12-22
Supplement: s1 [file s1]

Table S7 Summary of hub genes regulating AML progression

| hub gene | Official Full Name<br>(HGNC)                             | Effects on AML Progression                                                                                                     | PMID     |
|----------|----------------------------------------------------------|--------------------------------------------------------------------------------------------------------------------------------|----------|
| SIRT1    | Sirtuin 1                                                | SIRT regulated by FLT3 kinase activity plays a major role in harboring activating mutations.                                   | 24855208 |
|          |                                                          | Inhibition of SIRT1 expression or activity reduced the growth of FLT3-ITD AML LSCs.                                            | 25280219 |
| NFE2L2   | NFE2 Like BZIP<br>Transcription Factor 2                 | High NFE2L2 expression can induce gene instability-dependent drug resistance in AML.                                           | 33414469 |
| CDKN1A   | Cyclin Dependent Kinase<br>Inhibitor 1A                  | CDKN1A promotes G0-G1 cell-cycle arrest, and triggers apoptosis in AML cells.                                                  | 29626127 |
| CDKN2A   | Cyclin Dependent Kinase<br>Inhibitor 2A                  | Reduced expression of CDKN2A conferred inferior overall survival in human AML cohorts.                                         | 36400926 |
| CDH1     | Cadherin 1                                               | Promoter hypermethylation of the CDH1 genes was closely associated with an internal tandem duplication (ITD) of the FLT3 gene. | 16281935 |
| STAT3    | Signal Transducer And<br>Activator Of<br>Transcription 3 | STAT pathways could be potential targets for reducing resistance developed in AML patients receiving FLT3 inhibitors.          | 19144991 |
| ATG7     | Autophagy Related 7                                      | The key autophagy genes Atg5 and Atg7 reversed the FLT3 degradation to regulate the progression of FLT3-ITD mutated AML.       | 32284743 |
| TFRC     | Transferrin Receptor                                     | TFRC/Fe <sup>2+</sup> pathway exhibits potent anti-AML activity.                                                               | 36368726 |
| SQSTM1   | Sequestosome 1                                           | p62/SQSTM1 delivered FLT3-ITD proteins to the lysosome for subsequent degradation which may affect FLT3-ITD AML progression.   | 32284743 |

|       |                                    |                                                                                                            |          |
|-------|------------------------------------|------------------------------------------------------------------------------------------------------------|----------|
| CD44  | CD44 Molecule (Indian Blood Group) | CD44 plays a major role in AML patients harboring FLT3 mutations.                                          | 36163632 |
| GSK3B | Glycogen Synthase Kinase 3 Beta    | Phosphorylation of ERK and GSK3B regulated high-risk AML patients with FLT3 wildtype.                      | 35857899 |
| G6PD  | Glucose-6-Phosphate Dehydrogenase  | Inactivating ATM or its downstream effector G6PD sensitizes AML cells to FLT3 inhibitor-induced apoptosis. | 27791036 |
