# Supplementary material for: Hsa_circ_0015278 Regulates FLT3-ITD AML Progression via Ferroptosis-Related Genes
Source: MDPI journal article supplement (doi:10.3390/cancers15010071), 2022-12-22
Supplement: s1 [file s1]

Table S2. Primers of circRNA and mRNAs in present study

| circRNAs/mRNA    | Primer (5'- 3')                 |
|------------------|---------------------------------|
| hsa_circ_0015278 |                                 |
| divergent F      | 5'- CCTCAGGAAAACAGATGGCAC -3'   |
| divergent R      | 5'- CAACCACCAATCCACTACGG -3'.   |
| hsa_circ_0049365 |                                 |
| divergent F      | 5'- CTGTGGTGGTCTTGGTGAAG -3'    |
| divergent R      | 5'- ACTTCTTGCGTGGAGGTAG -3'     |
| hsa_circ_0003162 |                                 |
| divergent F      | 5'- TGGTGGTGTAAAAGTGTGAAAGA -3' |
| divergent R      | 5'- GGTATCCCATAAAGCTACCCAC -3'  |
| hsa_circ_0011536 |                                 |
| divergent F      | 5'- TGACAATGCTCAAGTGGTGG -3'    |
| divergent R      | 5'- TGCAAGATCCCCAGAGTTCA -3'    |
| GAPDH            |                                 |
| convergent F     | 5'- CATGTTTCGTCATGGGTGTGAA -3'  |
| convergent R     | 5'- GGCATGGACTGTGGTCATGAG -3'   |
