# Supplementary material for: Hsa_circ_0015278 Regulates FLT3-ITD AML Progression via Ferroptosis-Related Genes
Source: MDPI journal article supplement (doi:10.3390/cancers15010071), 2022-12-22
Supplement: s1 [file s1]

Table S4. Details of 11 co-expressed circRNAs in GSE94591

| <b>circBase ID</b> | <b>Gene Name</b> | <b>Location</b>           | <b>AML &amp; HC<br/>Log FC</b> | <b>FLT3<sup>+</sup> &amp; FLT3<sup>-</sup><br/>Log FC</b> |
|--------------------|------------------|---------------------------|--------------------------------|-----------------------------------------------------------|
| hsa_circ_0049356   | CARM1            | chr19:10913876-10916777   | 4.222439                       | 5.0956321                                                 |
| hsa_circ_0078051   | AIG1             | chr6:143486218-143605362  | 4.108214                       | 4.2193528                                                 |
| hsa_circ_0011929   | CTPS             | chr1:40997393-41001117    | 4.074232                       | 4.4832568                                                 |
| hsa_circ_0000370   | FLI1             | chr11:128758114-128782023 | 3.985417                       | 5.5226337                                                 |
| hsa_circ_0011536   | ZMYM4            | chr1:35358924-35361789    | 3.664993                       | 4.2394041                                                 |
| hsa_circ_0000086   | ST6GALNAC3       | chr1:76228473-76228588    | 3.621135                       | 4.0861721                                                 |
| hsa_circ_0060828   | TMEM189-UBE2V1   | chr20:50127974-50143621   | 3.355358                       | 3.6351438                                                 |
| hsa_circ_0003162   | BBS9             | chr7:33146241-33177591    | 3.11789                        | 2.9581438                                                 |
| hsa_circ_0003568   | IST1             | chr16:71920738-71921453   | 2.993501                       | 3.4411785                                                 |
| hsa_circ_0061817   | C2CD2            | chr21:41914597-41922085   | 2.97464                        | 3.170246                                                  |
| hsa_circ_0015278   | KLHL20           | chr1:173756975-173775842  | 2.801769                       | 3.1197386                                                 |
