# Supplementary material for: Hsa_circ_0015278 Regulates FLT3-ITD AML Progression via Ferroptosis-Related Genes
Source: Cancers (Basel). 2022 Dec 22;15(1):71. doi: 10.3390/cancers15010071 (PMC9817690; doi:10.3390/cancers15010071)
Supplement: Supplementary file 1 [file cancers-15-00071-s001.zip]

Archive with 16 entries (16 files):
- Fig.S1 Detailed flowchart of the comprehensive analysis and methods utilized in the present study.pdf
- Fig.S2 Identification of DEGs in AML.pdf
- Fig.S3 73 FerRGs were presented via Venn Diagram and PPI network.pdf
- Fig.S4 Screening and functional enrichment analysis of 15 hub genes.pdf
- Fig.S5 Evaluation of the diagnostic efficacy of hub genes.pdf
- Fig.S6 Evaluation of the prognostic efficacy of hub genes.pdf
- Fig.S7 Evaluation of the prognostic efficacy of miRNAs.pdf
- Fig.S8 Correlation analysis between miRNAs and mRNAs involved in the sub-network and clinicopathological parameters.pdf
- Fig.S9 GSEA enrichment analysis of CD44.pdf
- Table S1. The detailed information of microarray datasets from GEO database.pdf
- Table S2. The sequences of primer.pdf
- Table S3. Bioinformatics tools and databases.pdf
- Table S4. Details of 11 co-expressed circRNAs in GSE94591.pdf
- Table S5. GO and KEGG enrichment analysis of 73 FerRGs.pdf
- Table S6. 15 hub genes were obtained by the 12 algorithms.pdf
- Table S7 Summary of hub genes regulating AML progression.pdf
