# Supplementary figures and images for: Hsa_circ_0015278 Regulates FLT3-ITD AML Progression via Ferroptosis-Related Genes
Source: MDPI journal article supplement (doi:10.3390/cancers15010071), 2022-12-22

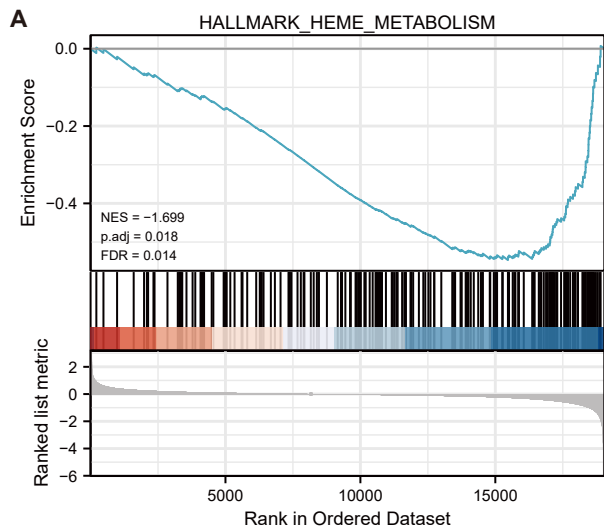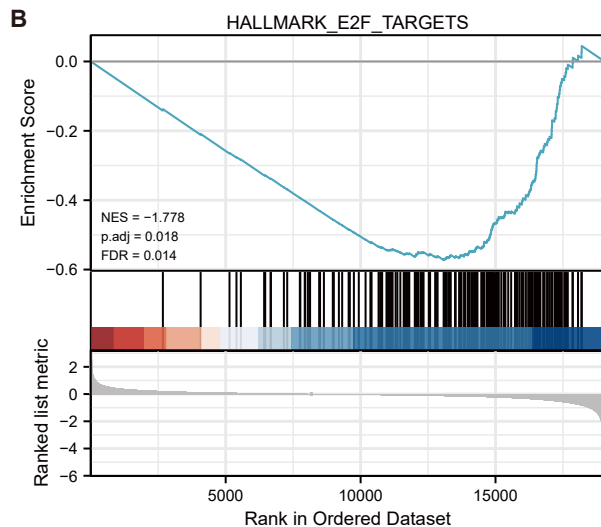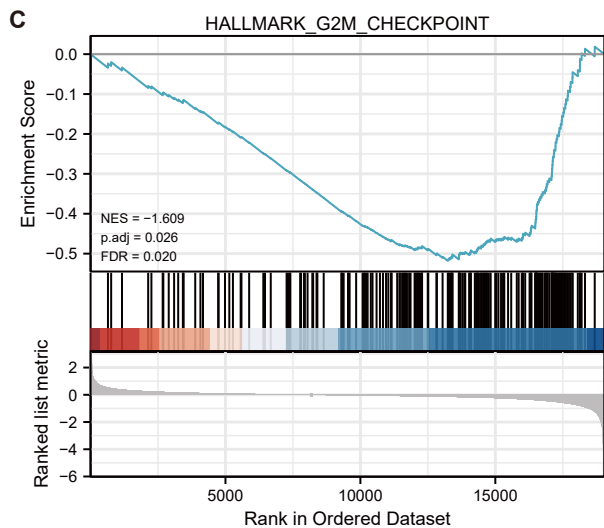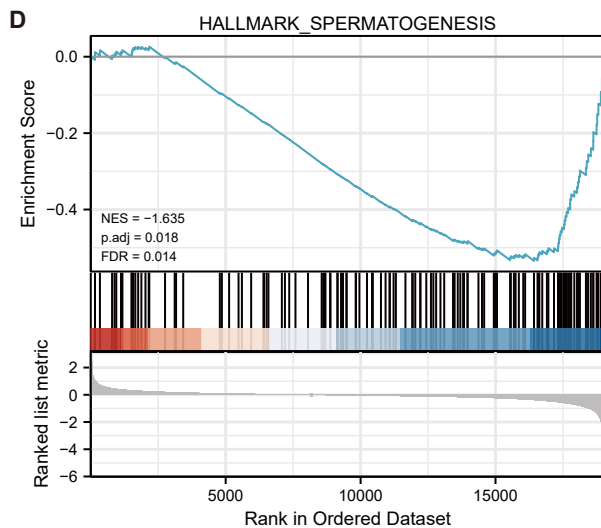

Supplement: s1 [file s1]

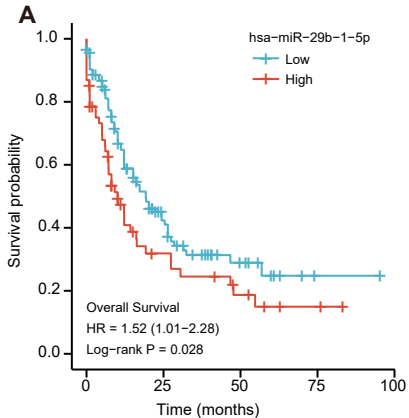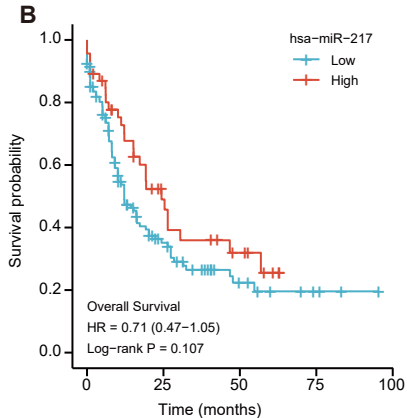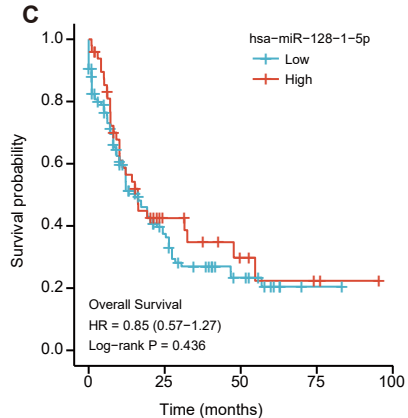

Supplement: s1 [file s1]

A

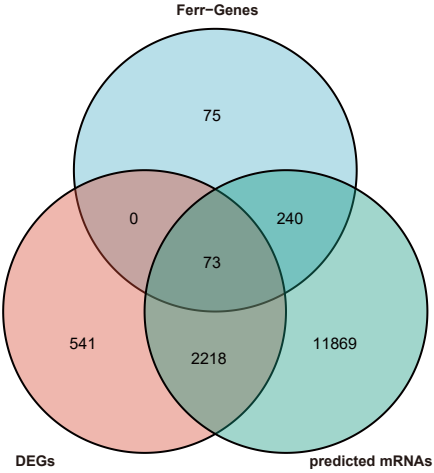

B

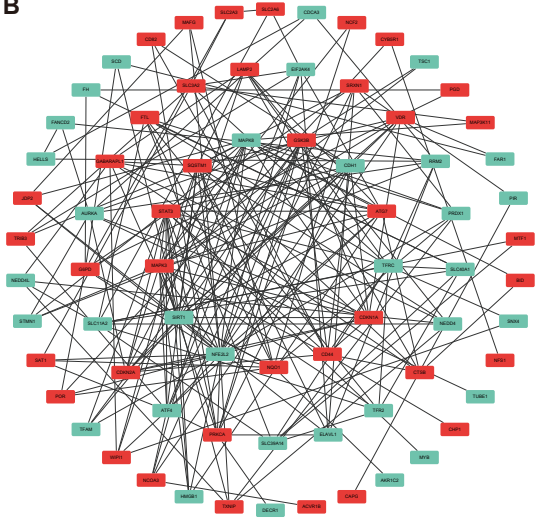

Supplement: s1 [file s1]

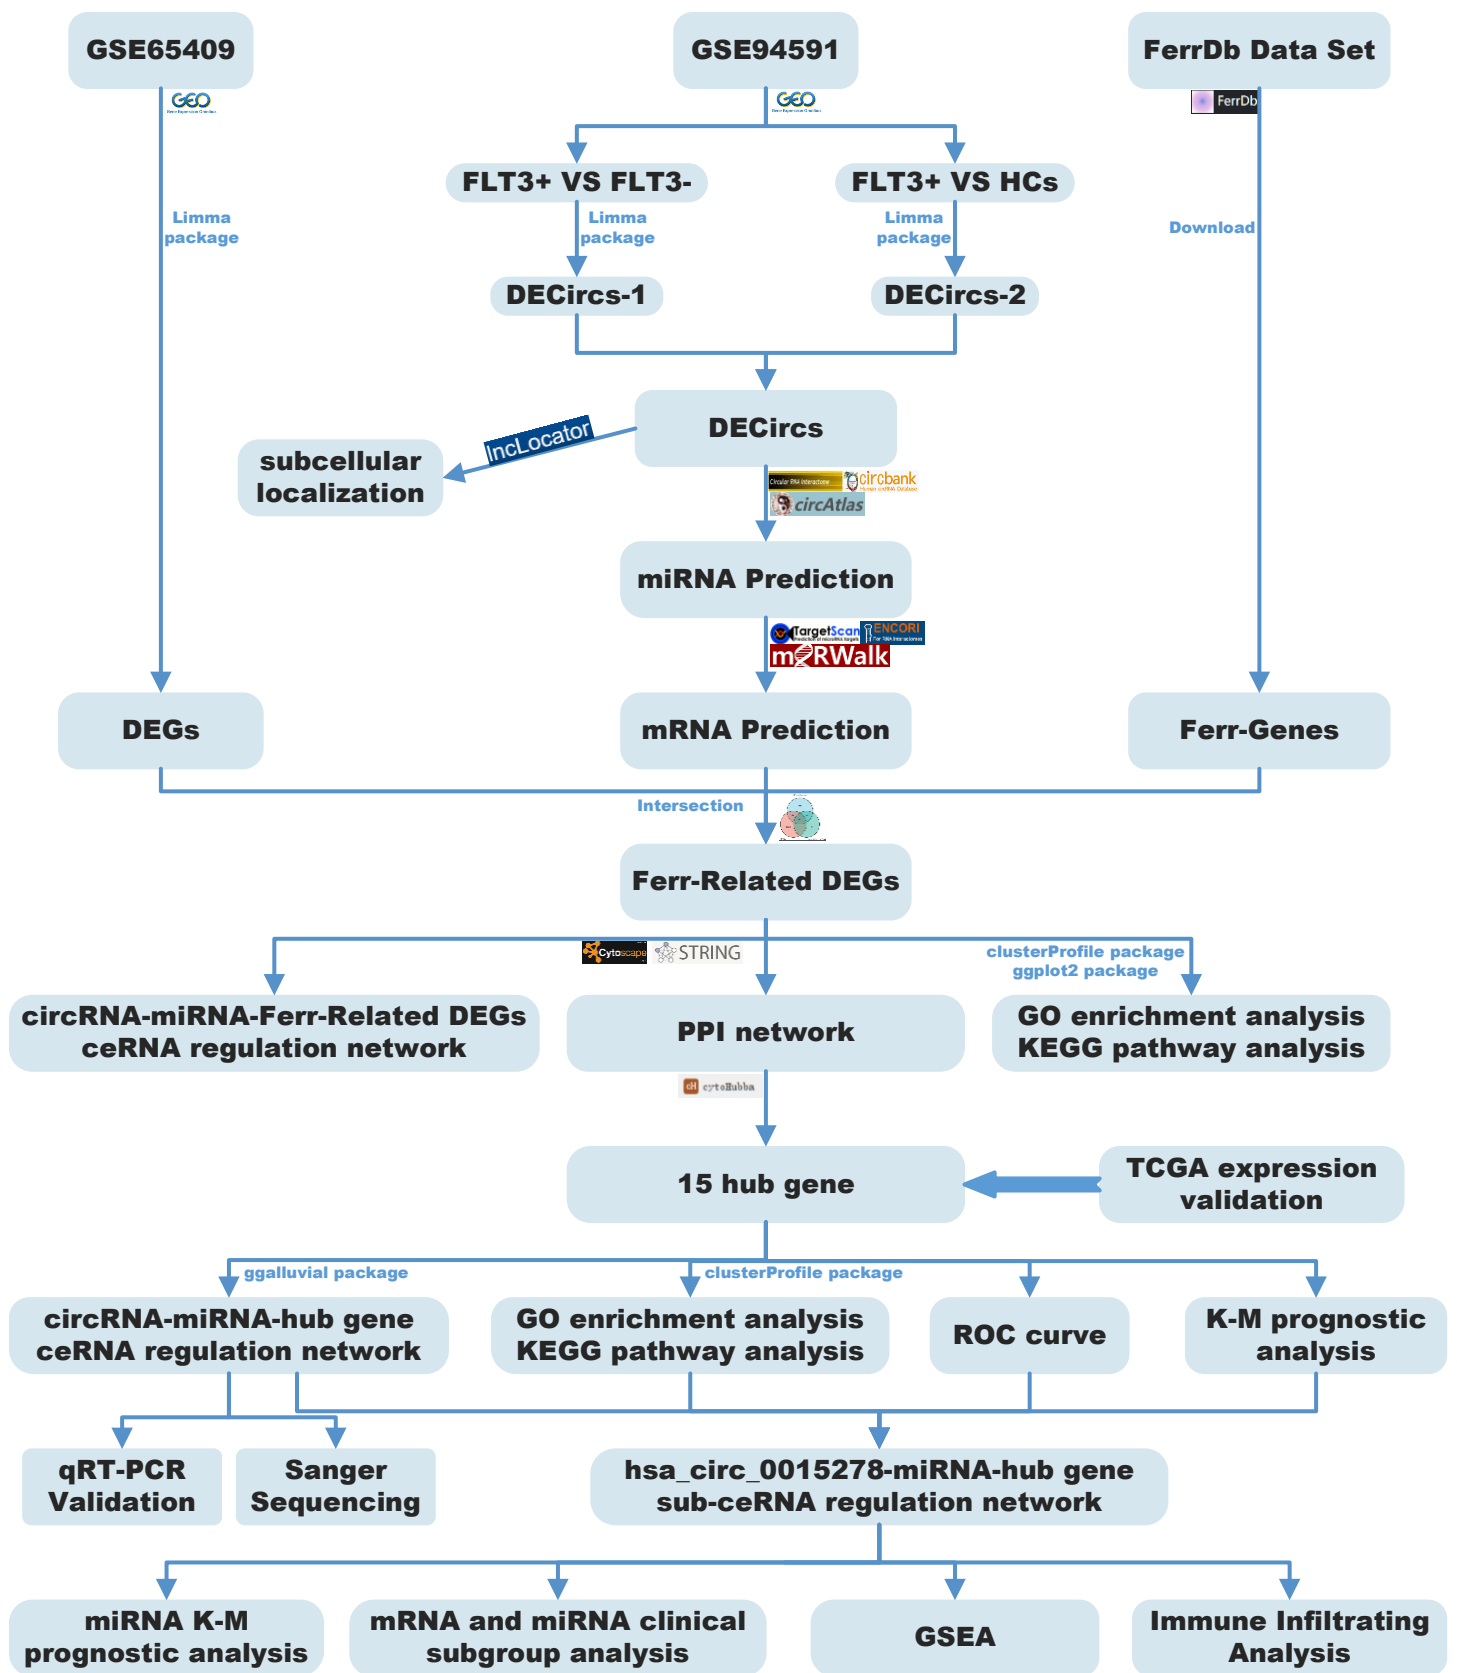

Supplement: s1 [file s1]

A

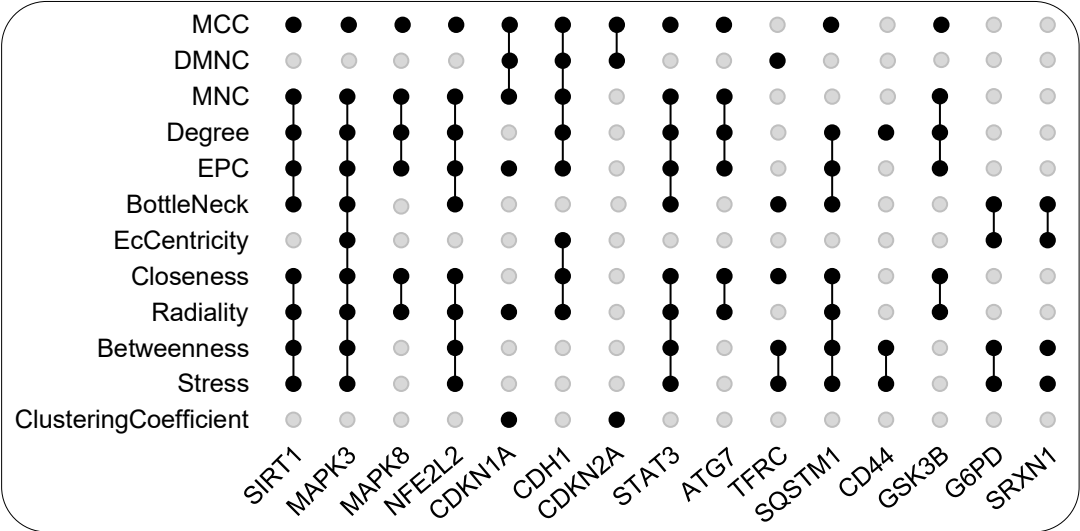

B

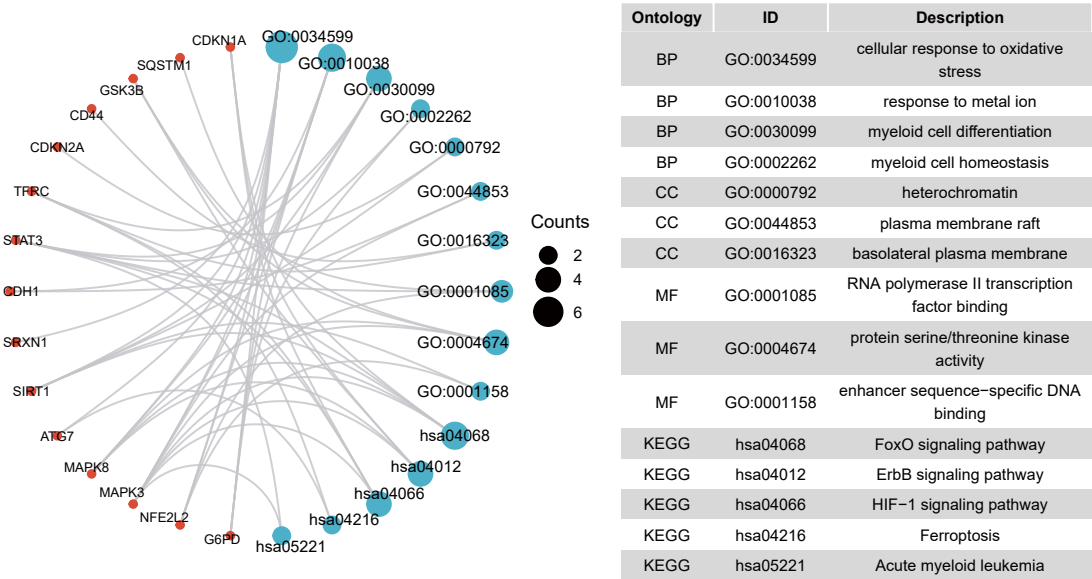

Supplement: s1 [file s1]

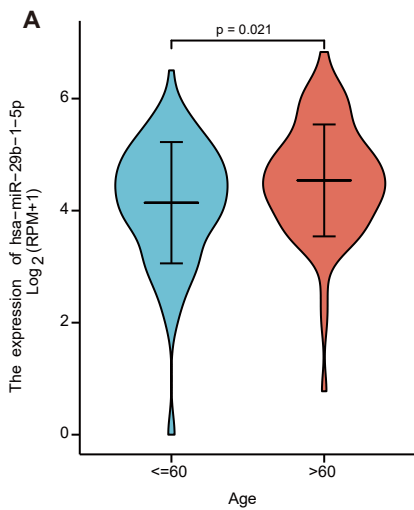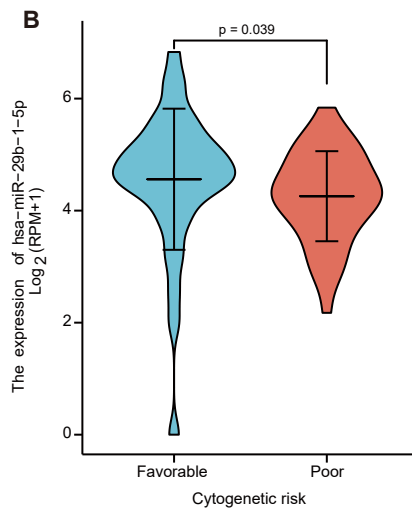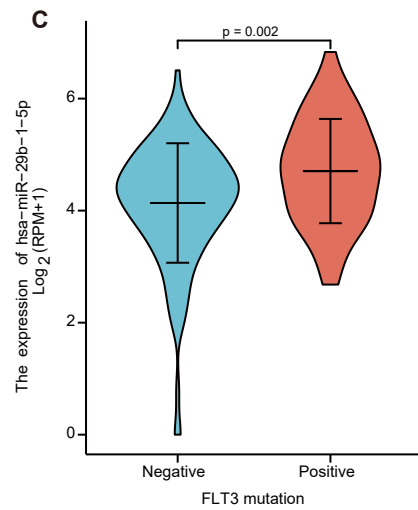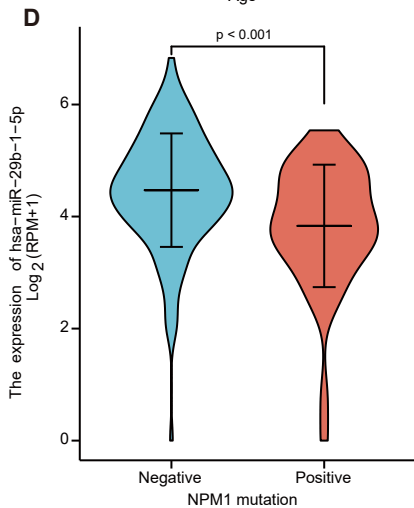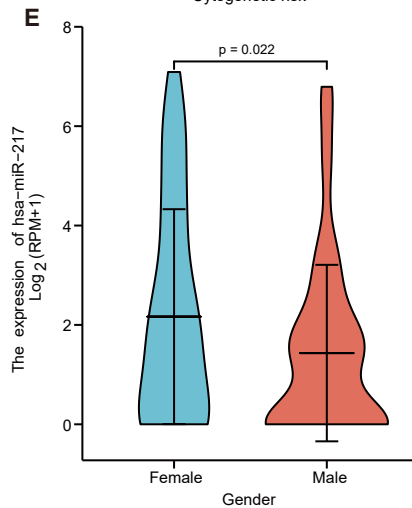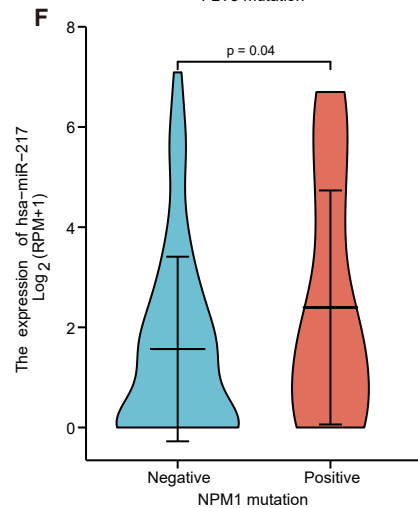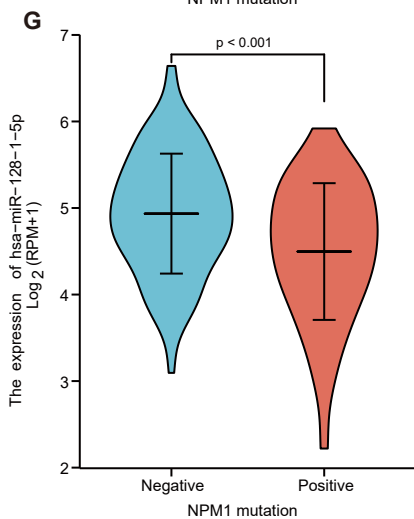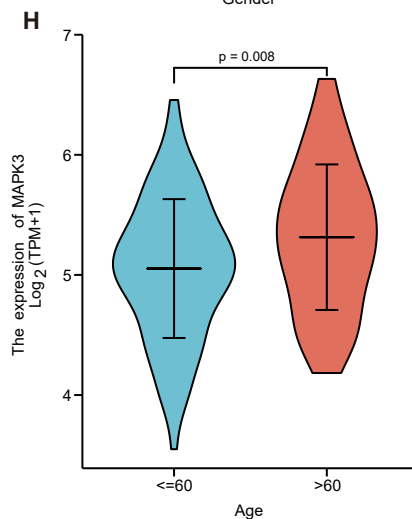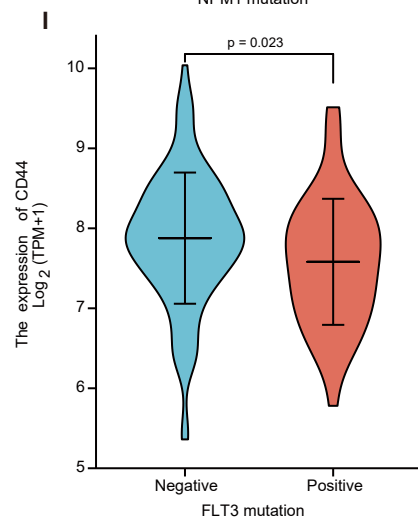

Supplement: s1 [file s1]

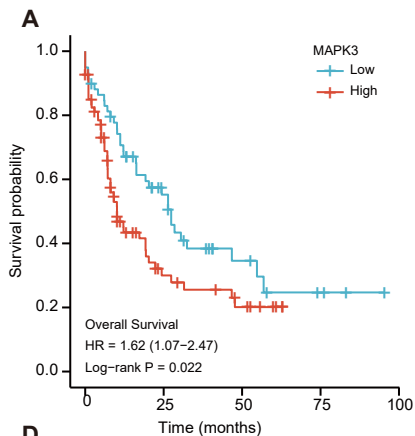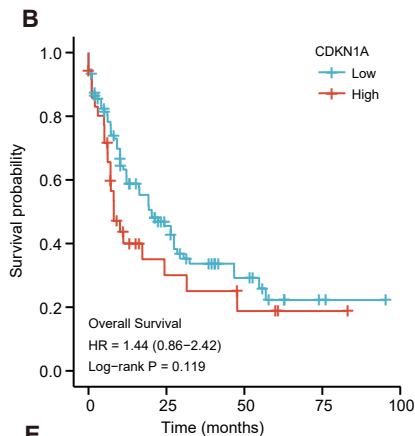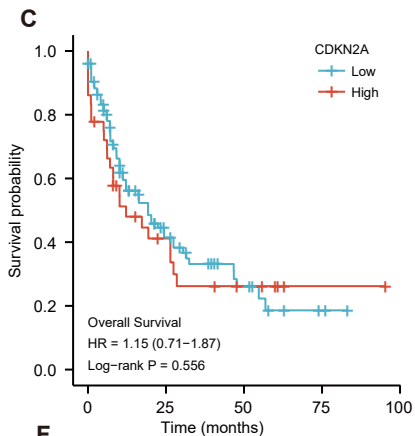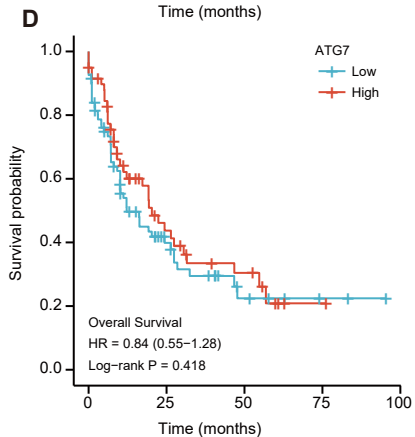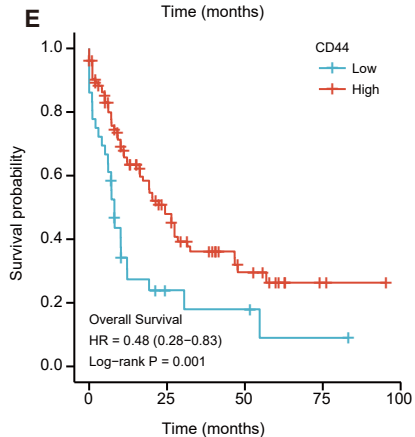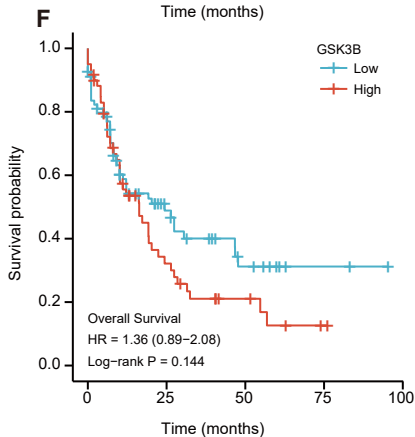

Supplement: s1 [file s1]

**A**

Volcano plot  
GSE65409 AML VS HCs

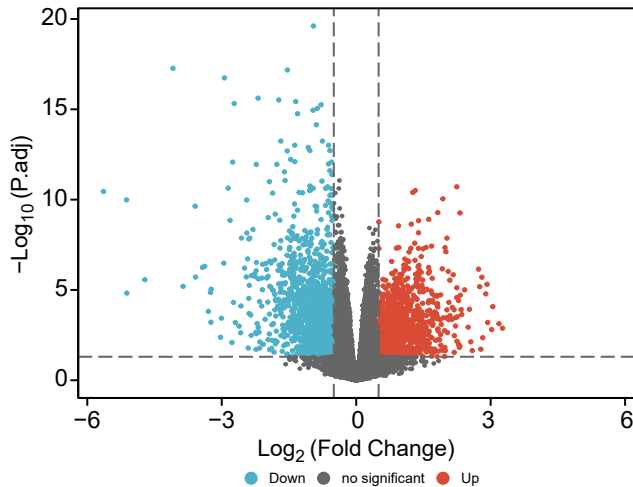**B**

Heatmap plot  
GSE65409 AML VS HCs

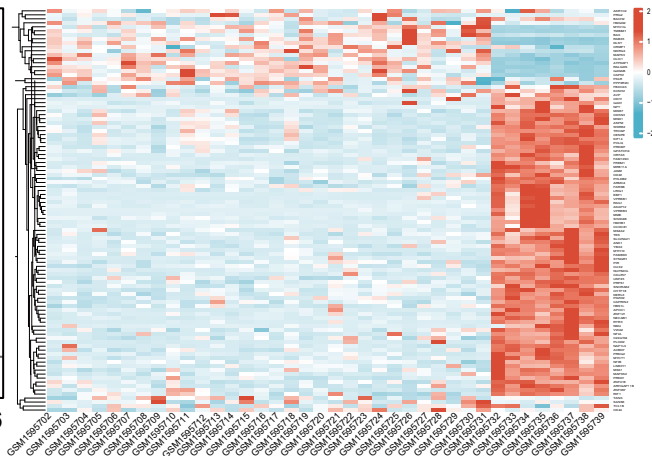

Supplement: s1 [file s1]

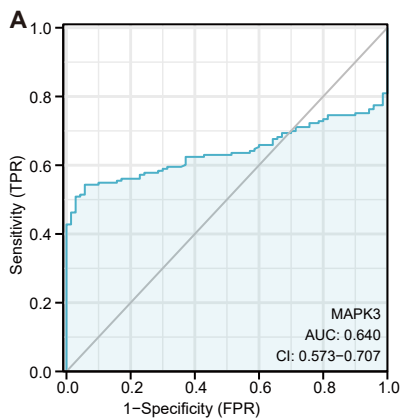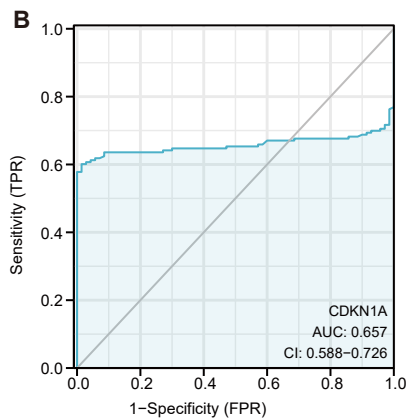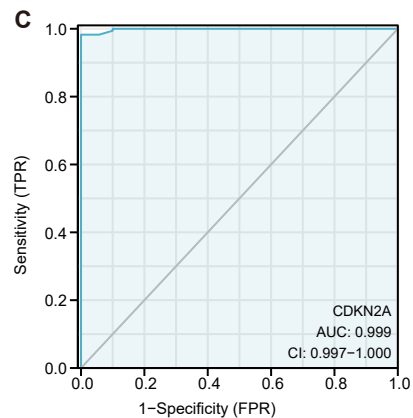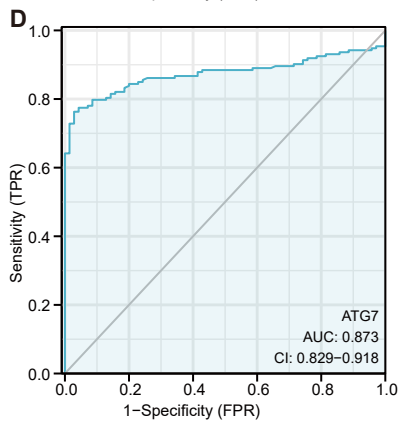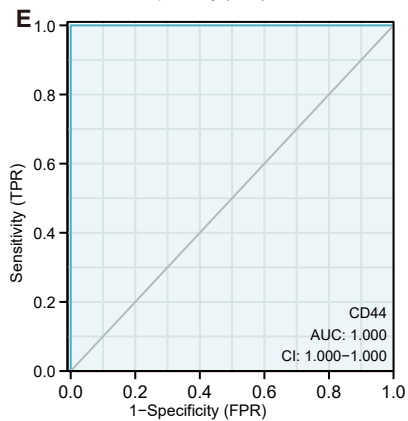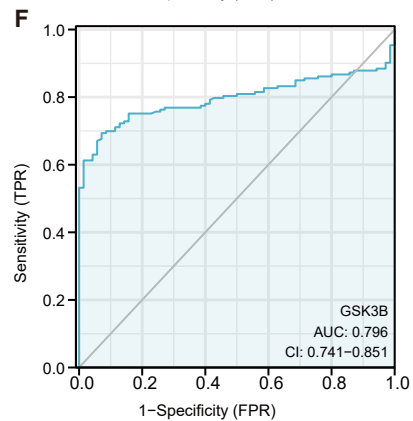

Supplement: s1 [file s1]
